# Supplementary material
Source: PubMed Central journal article supplement (PMC5787226)
Supplement: NIHMS935401-supplement-Supplementary_Figure_S1.pdf [file NIHMS935401-supplement-Supplementary_Figure_S1.pdf]

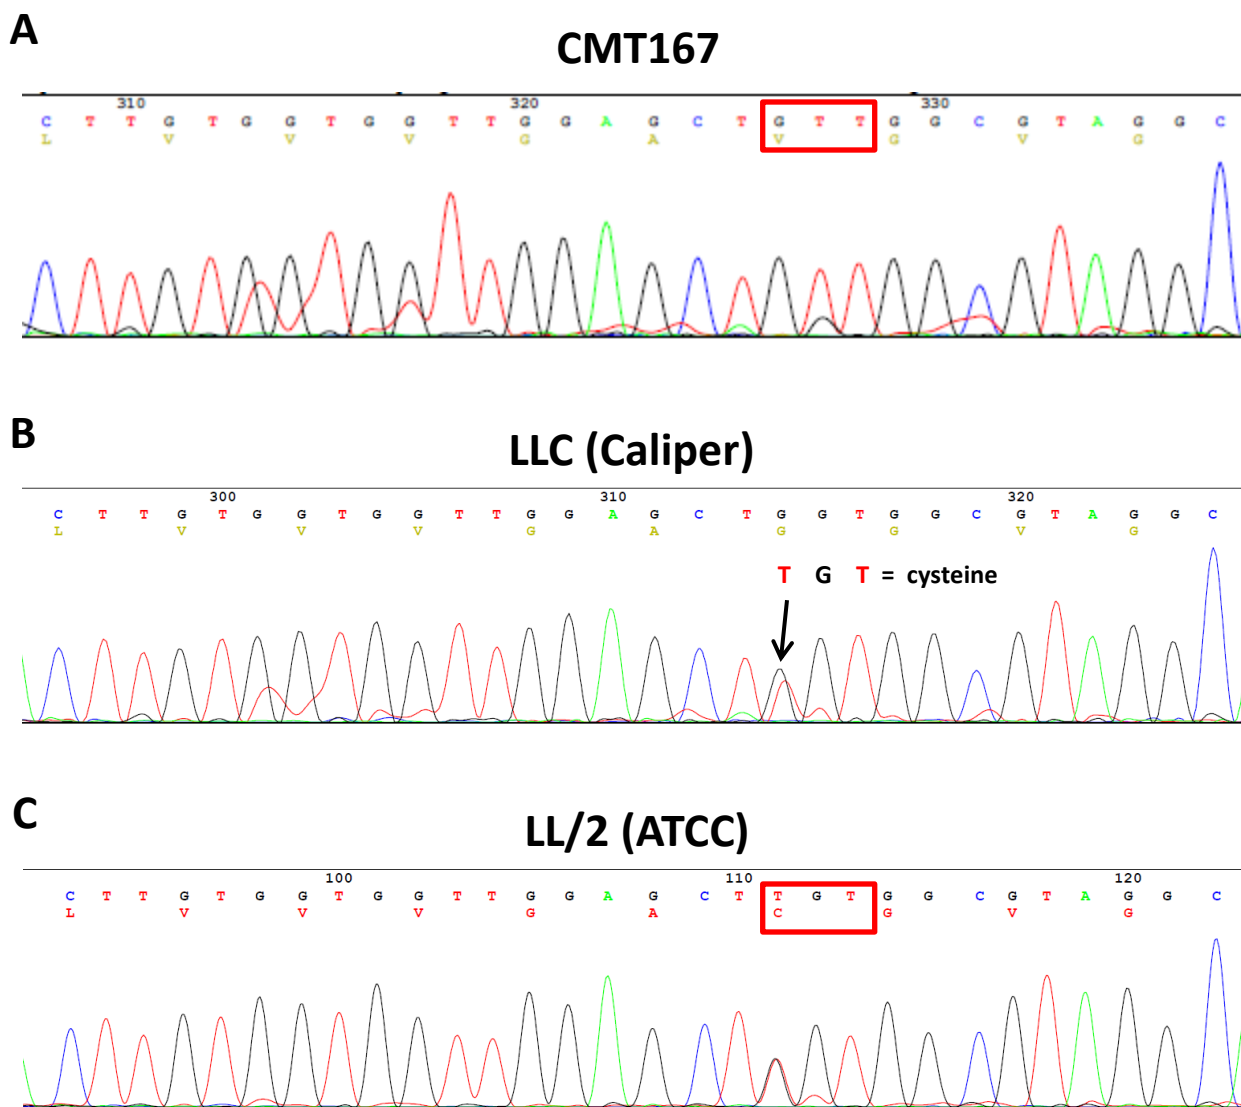

**Supplementary Figure S1.** Direct DNA sequencing reveals activating *Kras* mutations in CMT167, LLC, and LL/2 cells. (A) Nucleotide sequence of the *Kras* cDNA obtained from mRNA extracted from CMT167 cells reveals a G12V mutation. (B and C) Nucleotide sequences of the *Kras* cDNA obtained from mRNA extracted from LL/2-luc-M38 cells (Caliper) and LL/2 cells (ATCC) reveals a double peak at codon 12 that correlates with a G12C mutation.
