# Supplementary material
Source: PubMed Central journal article supplement (PMC5787226)
Supplement: NIHMS935401-supplement-Supplementary_Figure_S7.pdf [file NIHMS935401-supplement-Supplementary_Figure_S7.pdf]

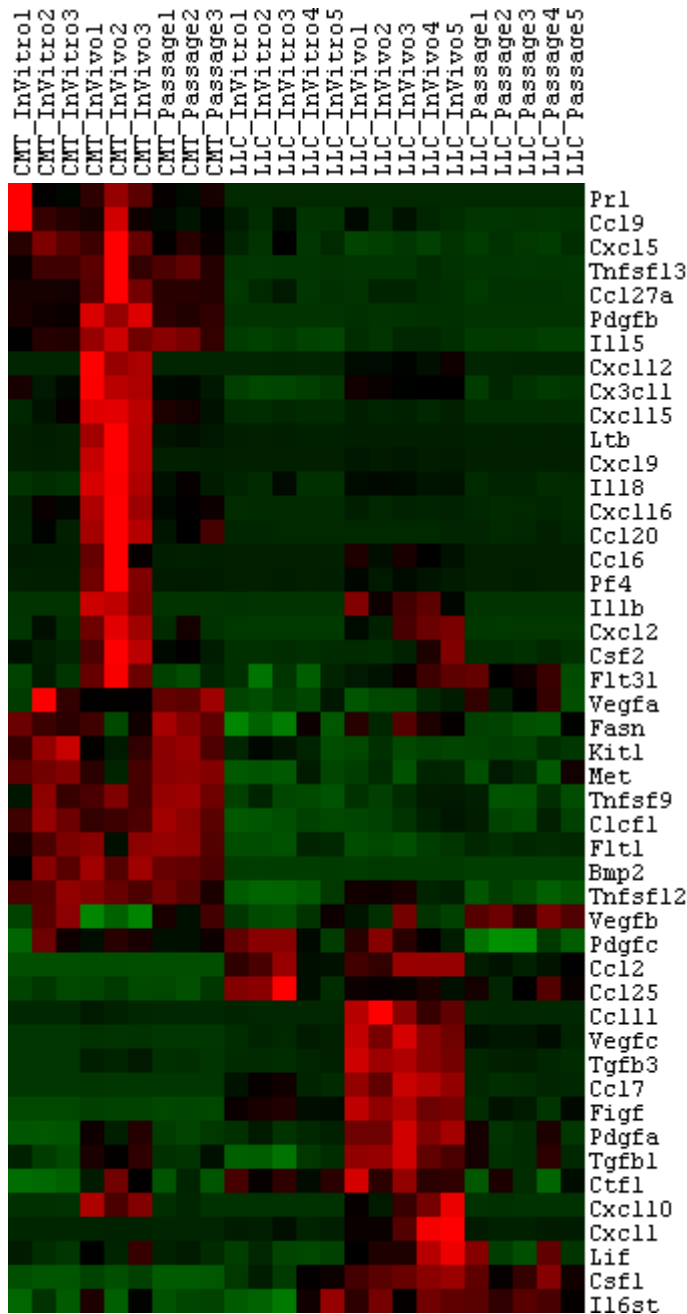

**Supplementary Figure S7.** Heatmap of cytokines that were expressed  $\geq 5$ -fold higher in CMT167 cells *in vivo* compared to LLC cells *in vivo*. RNA was extracted from CMT167 cells or LLC cells grown *in vitro* (in vitro), recovered from orthotopic tumors implanted in GFP-expressing transgenic mice using flow cytometry (in vivo), or cells recovered from orthotopic tumors and re-grown *in vitro* (passage). RNA sequencing was performed and differentially expressed genes that belonged to the “Immune System” gene set (Reactome Database) were subjected to hierarchical clustering.
